# Supplementary material
Source: PubMed Central journal article supplement (PMC2151721)

**Supplemental Figure S1** “The pCLEAN dual binary vector system for *Agrobacterium*-mediated plant transformation” by Thole et al. (2007). Effect of the type of left border (LB) sequence on the level of backbone transfer and the position of the *GFP* gene in the backbone sequence for its detection. Average (avg) GFP fluorescence in leaves (n=10 to 52) was scored 2.5 days post infiltration (*p.i.*) and derived from at least two independent experiments. Values followed by the same letter are not significantly different (Kruskal-Wallis test,  $P < 0.05$ )

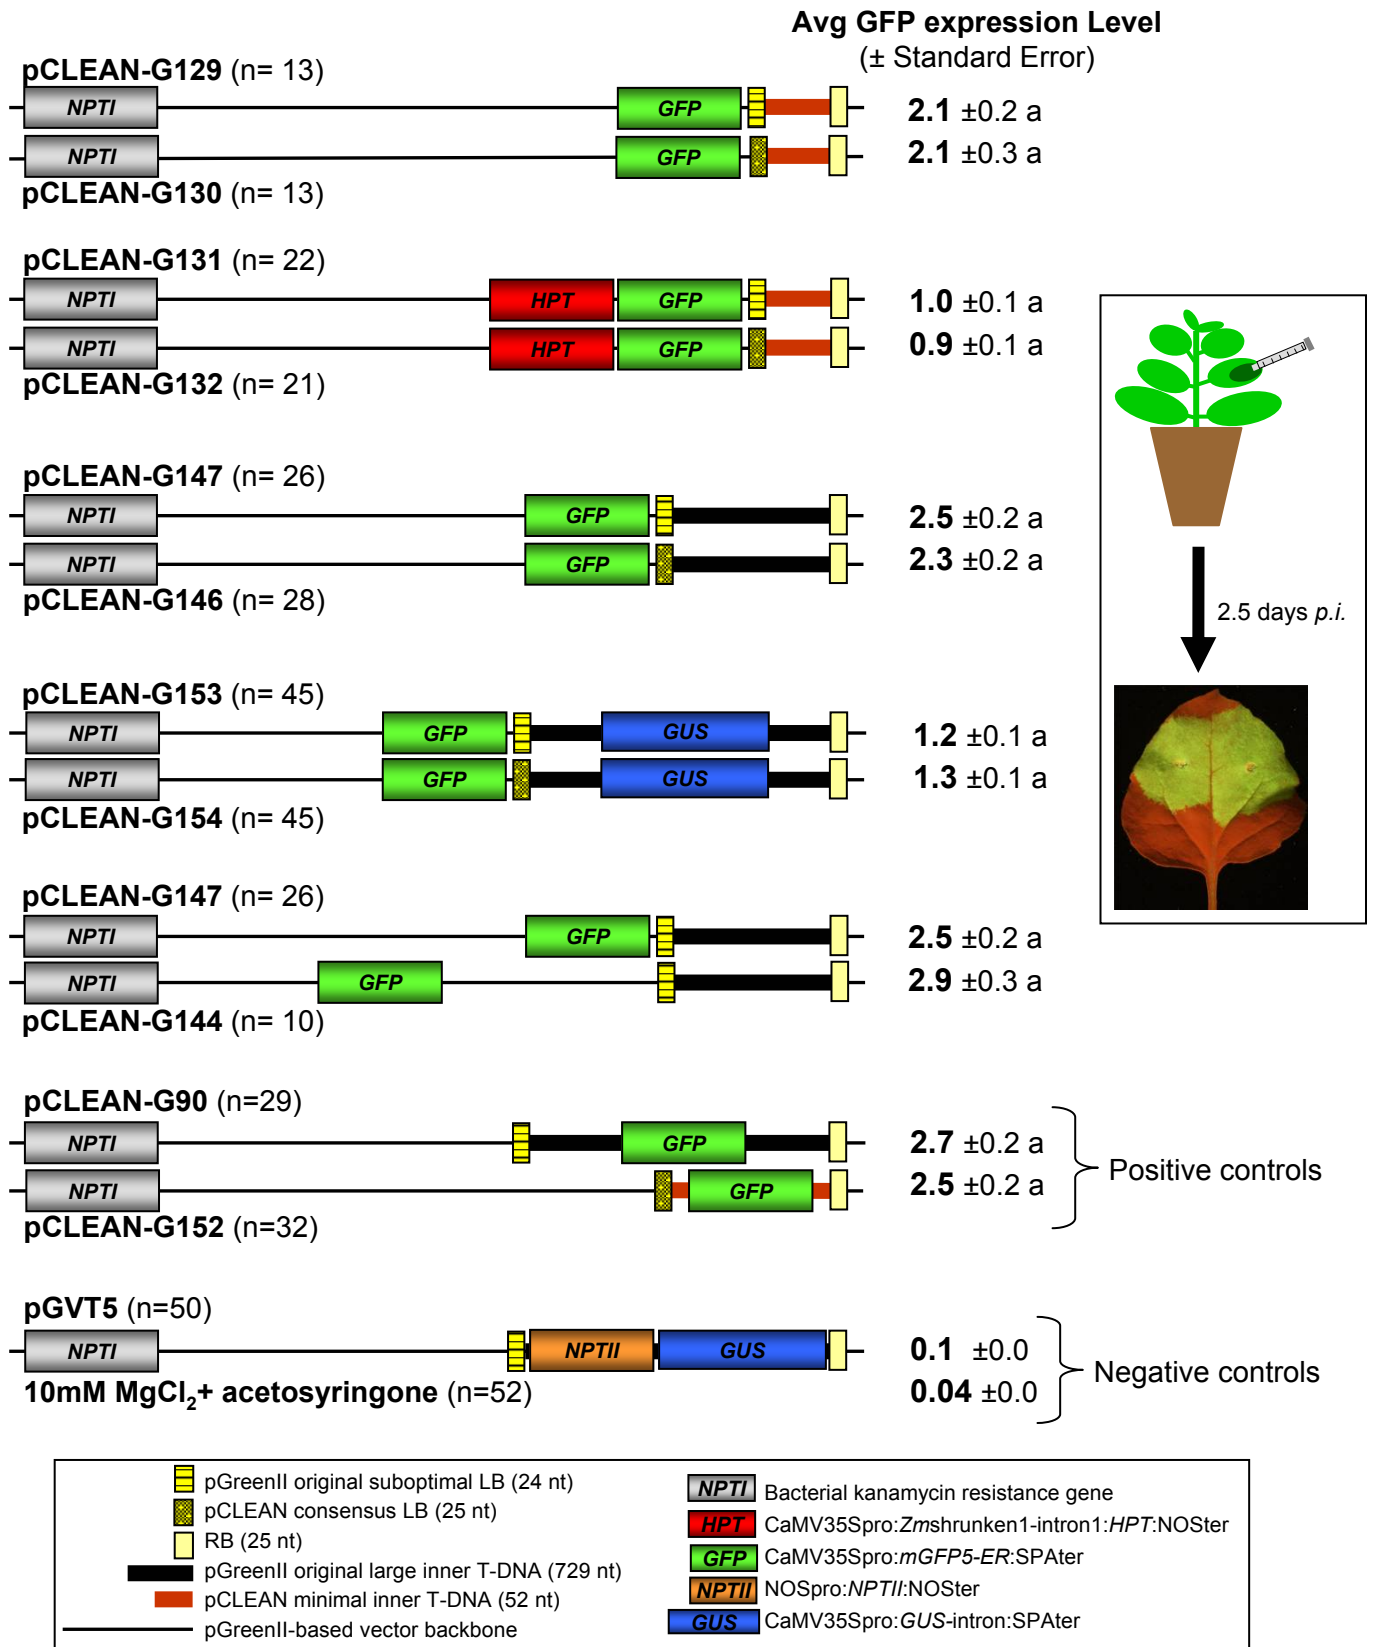

Supplement: plntphys_pp.107.108563_1.pdf [file plntphys_pp.107.108563_1.pdf]
